# Supplementary material
Source: Royal Society of Chemistry journal article supplement (doi:10.1039/d6cp00873a)
Supplement: d6cp00873a1.pdf [file d6cp00873a1.pdf]

# **Supplementary Information: On the D<sub>2</sub>/H<sub>2</sub> Adsorption Selectivity of Sodium Decorated Polycyclic Aromatic Hydrocarbons. I. Accurate Modelling Approaches and Low Pressure Selectivity**

Massimo Mella,<sup>\*,†</sup> Esther García-Arroyo,<sup>‡</sup> Marta I. Hernández,<sup>\*,‡</sup>

Massimiliano Bartolomei,<sup>‡</sup> and José Campos-Martínez<sup>‡</sup>

<sup>†</sup>*Dipartimento di Scienza ed Alta Tecnologia, Università degli Studi dell'Insubria, via  
Valleggio 11, 22100 Como, Italy*

<sup>‡</sup>*Instituto de Física Fundamental, Consejo Superior de Investigaciones Científicas  
(IFF-CSIC), Serrano 123, 28006 Madrid, Spain*

E-mail: massimo.mella@uninsubria.it; marta@iff.csic.es

# 1) Optimized structure for $[\text{H-Cor-Na}]^+$

Table S1: Cartesian coordinates of the optimized geometry used for  $[\text{H-Cor-Na}]^+$  and CM5 atomic charges distribution (Marenich *et al*, J. Chem. Theor. Comp. 8, 527 (2012))

| Atom | $x$ (Å)   | $y$ (Å)   | $z$ (Å)   | $q/e$     |
|------|-----------|-----------|-----------|-----------|
| C    | -0.024283 | -1.446066 | -0.001979 | -0.012847 |
| C    | -1.254332 | -0.722875 | -0.008805 | -0.014314 |
| C    | -1.239843 | 0.710148  | -0.000821 | -0.014392 |
| C    | -0.009984 | 1.412485  | 0.005535  | -0.015919 |
| C    | 1.240062  | 0.687345  | 0.001530  | -0.016566 |
| C    | 1.220306  | -0.741653 | 0.007505  | -0.010870 |
| C    | -0.037612 | -2.863509 | 0.001760  | 0.002645  |
| C    | -2.486673 | -1.422550 | -0.012204 | 0.002369  |
| C    | -2.476570 | 1.419827  | 0.010913  | 0.000956  |
| C    | -0.002390 | 2.849522  | 0.021016  | -0.009478 |
| C    | 2.470234  | 1.363205  | 0.001600  | 0.010574  |
| C    | 2.439288  | -1.471135 | 0.022097  | 0.001709  |
| C    | -1.284620 | -3.532785 | -0.010721 | -0.028897 |
| C    | -2.464631 | -2.839090 | -0.017846 | -0.028203 |
| C    | -3.698385 | -0.679128 | -0.012539 | -0.031386 |
| C    | -3.687724 | 0.689134  | 0.000191  | -0.030484 |
| C    | -2.443205 | 2.841606  | 0.030056  | -0.031830 |
| C    | -1.266355 | 3.525083  | 0.037646  | -0.028705 |
| C    | 1.193635  | 3.537657  | 0.011004  | -0.014992 |
| C    | 2.520415  | 2.868077  | -0.045378 | -0.047242 |
| C    | 3.656318  | 0.622778  | 0.015982  | -0.033156 |
| C    | 3.649851  | -0.756712 | 0.027632  | -0.026650 |
| C    | 2.389752  | -2.897324 | 0.022330  | -0.029473 |
| C    | 1.203395  | -3.563172 | 0.011701  | -0.030075 |
| H    | -1.293392 | -4.614656 | -0.018234 | 0.062155  |
| H    | -3.405692 | -3.372680 | -0.030776 | 0.062224  |
| H    | -4.637451 | -1.215669 | -0.025196 | 0.061241  |
| H    | -4.621301 | 1.236184  | -0.001546 | 0.061806  |
| H    | -3.381683 | 3.380253  | 0.033334  | 0.061709  |
| H    | -1.267804 | 4.606947  | 0.046030  | 0.060987  |
| H    | 1.180127  | 4.619600  | 0.014795  | 0.057620  |
| H    | 3.165630  | 3.244558  | 0.759725  | 0.057506  |
| H    | 4.601826  | 1.150068  | 0.010763  | 0.061333  |
| H    | 4.583781  | -1.302533 | 0.033651  | 0.062170  |
| H    | 3.322358  | -3.445598 | 0.025416  | 0.062044  |
| H    | 1.186737  | -4.644941 | 0.006225  | 0.062168  |
| H    | 3.044484  | 3.179895  | -0.961256 | 0.064137  |
| Na   | -0.061469 | -0.028301 | 2.328867  | 0.640237  |

## 2) Energy levels of H<sub>2</sub>/D<sub>2</sub> adsorbed to [H-Cor-Na]<sup>+</sup> and [CCCor-Na], and within PsAt/RB Models

**Table S2:** Lowest energy levels of H<sub>2</sub>/D<sub>2</sub> bound to [H-Cor-Na]<sup>+</sup> (PsAt model), presented as differences with respect to the ground state energy,  $E_l - E_0$ , in K.  $E_0 = -871.08$  and  $-940.26$  K for H<sub>2</sub> and D<sub>2</sub>, respectively.

| $l$ | $E_l - E_0$ (K) |                | $l$ | $E_l - E_0$ (K) |                |
|-----|-----------------|----------------|-----|-----------------|----------------|
|     | H <sub>2</sub>  | D <sub>2</sub> |     | H <sub>2</sub>  | D <sub>2</sub> |
| 0   | 0.000           | 0.000          | 20  | 161.020         | 103.049        |
| 1   | 10.603          | 10.896         | 21  | 163.149         | 120.223        |
| 2   | 15.248          | 17.670         | 22  | 167.049         | 120.803        |
| 3   | 18.071          | 20.067         | 23  | 168.351         | 121.728        |
| 4   | 19.514          | 20.462         | 24  | 175.221         | 129.243        |
| 5   | 24.330          | 22.409         | 25  | 179.981         | 134.432        |
| 6   | 30.570          | 23.621         | 26  | 180.783         | 136.450        |
| 7   | 40.706          | 32.133         | 27  | 181.717         | 137.216        |
| 8   | 41.476          | 34.637         | 28  | 192.678         | 139.478        |
| 9   | 55.636          | 39.685         | 29  | 193.152         | 140.110        |
| 10  | 55.724          | 40.104         | 30  | 207.587         | 140.246        |
| 11  | 74.161          | 48.410         | 31  | 207.744         | 142.253        |
| 12  | 74.324          | 49.114         | 32  | 217.633         | 149.231        |
| 13  | 96.212          | 59.661         | 33  | 217.674         | 150.327        |
| 14  | 96.237          | 59.772         | 34  | 229.085         | 157.056        |
| 15  | 121.421         | 72.426         | 35  | 229.692         | 157.318        |
| 16  | 121.466         | 72.453         | 36  | 233.926         | 160.980        |
| 17  | 149.456         | 86.873         | 37  | 240.453         | 161.010        |
| 18  | 149.828         | 86.933         | 38  | 244.732         | 167.118        |
| 19  | 153.574         | 103.024        | 39  | 247.557         | 167.345        |

**Table S3:** Lowest energy levels of H<sub>2</sub>/D<sub>2</sub> bound to [CCCor–Na] (PsAt model), presented as differences with respect to the ground state energy,  $E_l - E_0$ , in K.  $E_0 = -788.49$  and  $-848.97$  K for H<sub>2</sub> and D<sub>2</sub>, respectively.

| $l$ | $E_l - E_0$ (K) |                | $l$ | $E_l - E_0$ (K) |                |
|-----|-----------------|----------------|-----|-----------------|----------------|
|     | H <sub>2</sub>  | D <sub>2</sub> |     | H <sub>2</sub>  | D <sub>2</sub> |
| 0   | 0.000           | 0.000          | 20  | 143.946         | 81.282         |
| 1   | 1.387           | 0.502          | 21  | 144.152         | 97.196         |
| 2   | 1.412           | 0.504          | 22  | 146.122         | 97.198         |
| 3   | 5.240           | 1.720          | 23  | 150.789         | 112.278        |
| 4   | 5.346           | 1.724          | 24  | 151.536         | 113.149        |
| 5   | 8.767           | 2.502          | 25  | 151.866         | 113.198        |
| 6   | 21.270          | 16.326         | 26  | 155.352         | 114.536        |
| 7   | 27.735          | 18.626         | 27  | 157.282         | 114.762        |
| 8   | 27.821          | 18.630         | 28  | 164.637         | 114.821        |
| 9   | 40.711          | 24.383         | 29  | 166.850         | 115.137        |
| 10  | 40.792          | 24.387         | 30  | 176.674         | 116.560        |
| 11  | 57.160          | 31.515         | 31  | 178.151         | 122.692        |
| 12  | 57.248          | 33.432         | 32  | 181.432         | 125.526        |
| 13  | 76.647          | 42.360         | 33  | 181.486         | 125.848        |
| 14  | 76.685          | 42.363         | 34  | 190.080         | 131.567        |
| 15  | 98.924          | 53.799         | 35  | 193.384         | 131.872        |
| 16  | 98.968          | 53.801         | 36  | 195.219         | 133.201        |
| 17  | 123.853         | 66.793         | 37  | 196.462         | 133.208        |
| 18  | 123.915         | 66.801         | 38  | 196.682         | 138.689        |
| 19  | 142.803         | 81.280         | 39  | 199.724         | 140.239        |

Table S4: Lowest energy levels of even- $J$  RB  $\text{H}_2/\text{D}_2$  bound to  $[\text{H-Cor-Na}]^+$ , presented as differences with respect to the ground state energy,  $E_l - E_0$ , in K.  $E_0 = -1116.32$  and  $-1250.73$  K for  $\text{H}_2$  and  $\text{D}_2$ , respectively.

| $l$ | $E_l - E_0$ (K) |              | $l$ | $E_l - E_0$ (K) |              |
|-----|-----------------|--------------|-----|-----------------|--------------|
|     | $\text{H}_2$    | $\text{D}_2$ |     | $\text{H}_2$    | $\text{D}_2$ |
| 0   | 0.000           | 0.000        | 30  | 221.789         | 147.214      |
| 1   | 13.734          | 14.948       | 31  | 222.024         | 152.588      |
| 2   | 17.541          | 15.517       | 32  | 239.239         | 155.727      |
| 3   | 20.513          | 19.520       | 33  | 239.378         | 158.340      |
| 4   | 22.091          | 22.484       | 34  | 245.322         | 163.627      |
| 5   | 27.596          | 23.443       | 35  | 245.805         | 164.323      |
| 6   | 33.759          | 26.101       | 36  | 270.820         | 170.359      |
| 7   | 44.905          | 33.374       | 37  | 272.390         | 171.573      |
| 8   | 45.726          | 35.687       | 38  | 273.244         | 175.646      |
| 9   | 61.530          | 41.282       | 39  | 279.909         | 177.679      |
| 10  | 61.581          | 43.064       | 40  | 280.177         | 184.527      |
| 11  | 81.979          | 51.809       | 41  | 280.337         | 185.009      |
| 12  | 82.079          | 52.403       | 42  | 282.216         | 185.309      |
| 13  | 106.205         | 62.470       | 43  | 283.220         | 188.248      |
| 14  | 106.264         | 64.974       | 44  | 286.767         | 192.280      |
| 15  | 133.949         | 76.433       | 45  | 288.591         | 198.329      |
| 16  | 134.026         | 78.878       | 46  | 293.034         | 200.025      |
| 17  | 160.271         | 92.596       | 47  | 295.613         | 200.223      |
| 18  | 164.999         | 94.214       | 48  | 296.662         | 200.270      |
| 19  | 165.205         | 108.636      | 49  | 298.972         | 200.518      |
| 20  | 170.010         | 112.234      | 50  | 299.352         | 201.241      |
| 21  | 171.780         | 122.095      | 51  | 301.059         | 204.348      |
| 22  | 176.246         | 127.556      | 52  | 305.850         | 204.423      |
| 23  | 177.575         | 129.325      | 53  | 306.232         | 206.483      |
| 24  | 185.308         | 133.494      | 54  | 308.273         | 207.706      |
| 25  | 191.473         | 138.300      | 55  | 311.057         | 207.875      |
| 26  | 198.089         | 139.785      | 56  | 313.350         | 208.098      |
| 27  | 198.286         | 141.610      | 57  | 316.681         | 208.285      |
| 28  | 205.746         | 144.127      | 58  | 324.210         | 210.694      |
| 29  | 206.147         | 144.627      | 59  | 324.384         | 211.262      |

Table S5: Lowest energy levels of odd- $J$  RB  $\text{H}_2/\text{D}_2$  bound to  $[\text{H-Cor-Na}]^+$ , presented as differences with respect to the ground state energy,  $E_l - E_0$ , in K.  $E_0 = -1016.77$  and  $-1208.07$  K for  $\text{H}_2$  and  $\text{D}_2$ , respectively. To estimate the evaporation energy, one needs to subtract the energy for the  $J=1$  state of the gas phase species, which is 163.80 and 82.00 K for, respectively,  $\text{H}_2$  and  $\text{D}_2$ .

| $l$ | $E_l - E_0$ (K) |              | $l$ | $E_l - E_0$ (K) |              |
|-----|-----------------|--------------|-----|-----------------|--------------|
|     | $\text{H}_2$    | $\text{D}_2$ |     | $\text{H}_2$    | $\text{D}_2$ |
| 0   | 0.000           | 0.000        | 30  | 128.363         | 79.270       |
| 1   | 5.283           | 7.495        | 31  | 128.532         | 79.709       |
| 2   | 14.307          | 13.864       | 32  | 146.527         | 89.239       |
| 3   | 17.146          | 19.642       | 33  | 146.607         | 89.283       |
| 4   | 18.760          | 20.390       | 34  | 158.468         | 94.681       |
| 5   | 20.549          | 21.821       | 35  | 158.565         | 95.571       |
| 6   | 21.621          | 22.867       | 36  | 161.530         | 105.098      |
| 7   | 24.915          | 25.272       | 37  | 164.525         | 106.050      |
| 8   | 26.256          | 28.221       | 38  | 171.341         | 111.384      |
| 9   | 28.552          | 28.658       | 39  | 172.214         | 113.084      |
| 10  | 30.123          | 29.710       | 40  | 175.282         | 122.668      |
| 11  | 33.528          | 31.098       | 41  | 176.544         | 124.174      |
| 12  | 37.587          | 33.507       | 42  | 177.453         | 125.776      |
| 13  | 39.009          | 35.465       | 43  | 178.387         | 130.126      |
| 14  | 44.034          | 37.280       | 44  | 178.667         | 131.352      |
| 15  | 45.395          | 38.159       | 45  | 179.533         | 132.109      |
| 16  | 53.497          | 41.947       | 46  | 183.347         | 136.988      |
| 17  | 54.019          | 43.791       | 47  | 184.205         | 138.063      |
| 18  | 59.100          | 45.071       | 48  | 186.292         | 139.602      |
| 19  | 59.355          | 46.307       | 49  | 188.806         | 141.418      |
| 20  | 71.179          | 51.712       | 50  | 191.327         | 142.281      |
| 21  | 71.247          | 52.282       | 51  | 191.622         | 143.732      |
| 22  | 78.400          | 53.377       | 52  | 198.573         | 144.145      |
| 23  | 78.679          | 55.575       | 53  | 198.648         | 145.044      |
| 24  | 92.705          | 61.948       | 54  | 201.611         | 146.248      |
| 25  | 92.741          | 62.647       | 55  | 203.214         | 148.592      |
| 26  | 101.649         | 65.435       | 56  | 211.089         | 149.544      |
| 27  | 101.734         | 66.509       | 57  | 211.244         | 150.639      |
| 28  | 117.845         | 74.425       | 58  | 216.096         | 151.823      |
| 29  | 117.962         | 75.173       | 59  | 216.293         | 152.503      |

**Table S6:** Lowest energy levels of even- $J$  RB  $\text{H}_2/\text{D}_2$  bound to  $[\text{CCCor}-\text{Na}]$ , presented as differences with respect to the ground state energy,  $E_l - E_0$ , in K.  $E_0 = -1097.86$  and  $-1239.25$  K for  $\text{H}_2$  and  $\text{D}_2$ , respectively.

| $l$ | $E_l - E_0$ (K) |              | $l$ | $E_l - E_0$ (K) |              |
|-----|-----------------|--------------|-----|-----------------|--------------|
|     | $\text{H}_2$    | $\text{D}_2$ |     | $\text{H}_2$    | $\text{D}_2$ |
| 0   | 0.000           | 0.000        | 30  | 221.095         | 143.389      |
| 1   | 1.625           | 0.442        | 31  | 221.827         | 147.128      |
| 2   | 1.929           | 1.012        | 32  | 229.319         | 152.849      |
| 3   | 6.728           | 2.185        | 33  | 229.837         | 153.484      |
| 4   | 6.790           | 2.604        | 34  | 239.906         | 159.371      |
| 5   | 11.415          | 3.477        | 35  | 241.483         | 160.018      |
| 6   | 25.328          | 19.225       | 36  | 241.758         | 161.259      |
| 7   | 33.729          | 21.815       | 37  | 244.832         | 167.115      |
| 8   | 33.775          | 22.594       | 38  | 246.327         | 167.870      |
| 9   | 49.978          | 29.400       | 39  | 246.566         | 173.610      |
| 10  | 50.049          | 29.582       | 40  | 246.673         | 181.409      |
| 11  | 69.991          | 38.644       | 41  | 251.068         | 182.862      |
| 12  | 71.035          | 40.366       | 42  | 262.596         | 183.556      |
| 13  | 94.722          | 51.277       | 43  | 266.749         | 184.582      |
| 14  | 94.748          | 52.152       | 44  | 267.850         | 184.902      |
| 15  | 122.430         | 65.532       | 45  | 270.563         | 185.233      |
| 16  | 122.506         | 66.049       | 46  | 271.112         | 186.111      |
| 17  | 153.469         | 81.278       | 47  | 271.264         | 186.218      |
| 18  | 153.571         | 81.919       | 48  | 271.280         | 186.895      |
| 19  | 172.938         | 96.309       | 49  | 286.041         | 187.248      |
| 20  | 174.896         | 102.777      | 50  | 286.323         | 187.321      |
| 21  | 175.032         | 117.262      | 51  | 298.539         | 187.921      |
| 22  | 180.563         | 120.491      | 52  | 300.777         | 188.104      |
| 23  | 180.750         | 130.523      | 53  | 304.514         | 189.267      |
| 24  | 187.275         | 130.903      | 54  | 305.689         | 189.451      |
| 25  | 187.322         | 132.682      | 55  | 309.829         | 189.631      |
| 26  | 188.296         | 132.963      | 56  | 309.883         | 190.032      |
| 27  | 197.559         | 134.903      | 57  | 318.603         | 190.214      |
| 28  | 207.826         | 135.681      | 58  | 318.824         | 190.509      |
| 29  | 208.497         | 135.879      | 59  | 318.968         | 190.656      |

Table S7: Lowest energy levels of odd- $J$  RB  $\text{H}_2/\text{D}_2$  bound to  $[\text{CCCor}-\text{Na}]$ , presented as differences with respect to the ground state energy,  $E_l - E_0$ , in K.  $E_0 = -1011.53$  and  $-1206.11$  K for  $\text{H}_2$  and  $\text{D}_2$ , respectively. To estimate the evaporation energy, one needs to subtract the energy for the  $J=1$  state of the gas phase species, which is 163.80 and 82.00 K for, respectively,  $\text{H}_2$  and  $\text{D}_2$ .

| $l$ | $E_l - E_0$ (K) |              | $l$ | $E_l - E_0$ (K) |              |
|-----|-----------------|--------------|-----|-----------------|--------------|
|     | $\text{H}_2$    | $\text{D}_2$ |     | $\text{H}_2$    | $\text{D}_2$ |
| 0   | 0.000           | 0.000        | 30  | 124.430         | 81.299       |
| 1   | 1.582           | 0.311        | 31  | 124.444         | 82.129       |
| 2   | 1.886           | 1.122        | 32  | 151.634         | 82.592       |
| 3   | 6.535           | 1.832        | 33  | 152.097         | 83.177       |
| 4   | 6.585           | 3.748        | 34  | 152.173         | 94.931       |
| 5   | 10.981          | 4.273        | 35  | 152.402         | 98.214       |
| 6   | 25.220          | 18.669       | 36  | 173.731         | 99.594       |
| 7   | 29.009          | 21.000       | 37  | 175.661         | 100.687      |
| 8   | 30.408          | 22.585       | 38  | 175.747         | 112.471      |
| 9   | 31.283          | 28.419       | 39  | 180.476         | 113.108      |
| 10  | 32.559          | 29.825       | 40  | 181.798         | 118.691      |
| 11  | 33.219          | 30.386       | 41  | 183.214         | 119.526      |
| 12  | 36.689          | 30.891       | 42  | 183.525         | 126.776      |
| 13  | 36.770          | 32.004       | 43  | 184.874         | 128.423      |
| 14  | 41.002          | 32.353       | 44  | 187.091         | 129.988      |
| 15  | 49.555          | 35.546       | 45  | 187.800         | 131.164      |
| 16  | 49.660          | 35.985       | 46  | 197.412         | 132.277      |
| 17  | 54.466          | 38.374       | 47  | 200.615         | 132.501      |
| 18  | 62.829          | 40.686       | 48  | 202.165         | 136.792      |
| 19  | 63.175          | 48.974       | 49  | 203.379         | 137.323      |
| 20  | 69.510          | 51.572       | 50  | 206.707         | 139.113      |
| 21  | 70.079          | 51.768       | 51  | 206.960         | 144.082      |
| 22  | 79.378          | 52.010       | 52  | 209.575         | 146.705      |
| 23  | 79.505          | 52.665       | 53  | 211.034         | 149.306      |
| 24  | 93.672          | 59.090       | 54  | 216.506         | 149.423      |
| 25  | 93.724          | 60.484       | 55  | 216.872         | 149.836      |
| 26  | 99.809          | 64.336       | 56  | 218.614         | 152.213      |
| 27  | 100.370         | 67.817       | 57  | 219.032         | 156.737      |
| 28  | 120.910         | 69.104       | 58  | 221.271         | 157.640      |
| 29  | 121.325         | 70.954       | 59  | 225.673         | 159.763      |

### 3) Minimum energy path of H<sub>2</sub> adsorbed on [H–Cor–Na]<sup>+</sup> (PsAt)

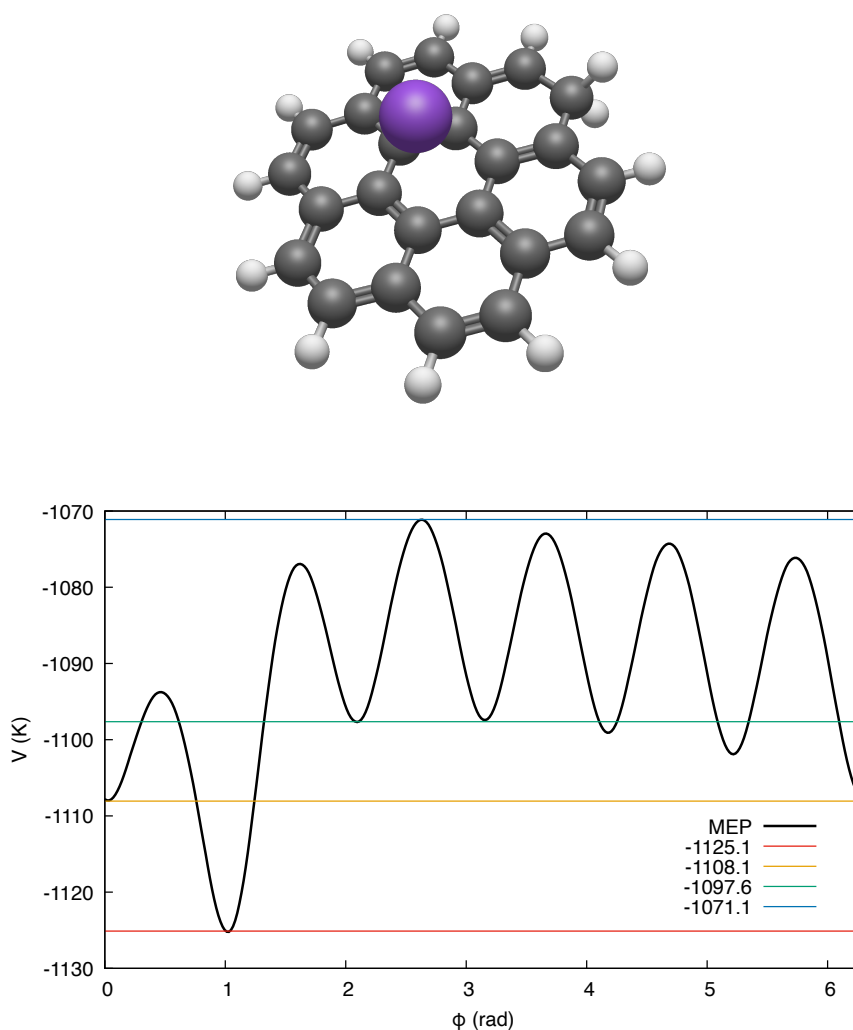

Figure S1: Minimum energy path (MEP), as a function of the angle  $\varphi$  (in rad), for the H<sub>2</sub>-[H–Cor–Na]<sup>+</sup> interaction within the PsAt approximation. Horizontal lines indicate the potential energy of selected maxima and minima along the path for comparison purpose. The deeper well observed at  $\varphi \approx 1$  rad is due to the vicinity of the proton that protrudes over the coronene plane (see scheme above). The ground state wavefunctions of H<sub>2</sub>/D<sub>2</sub>-[H–Cor–Na]<sup>+</sup> are localized on top of this well. The lack of a  $C_6$  symmetry in this MEP explains the angular distributions of the low-lying wavefunctions, an effect that fades out for the higher energy states (see Fig. 3 of the main article).

## 4) Probability densities of some odd- $J$ (RB) $\text{H}_2\text{-[H-Cor-Na]}^+$ bound states

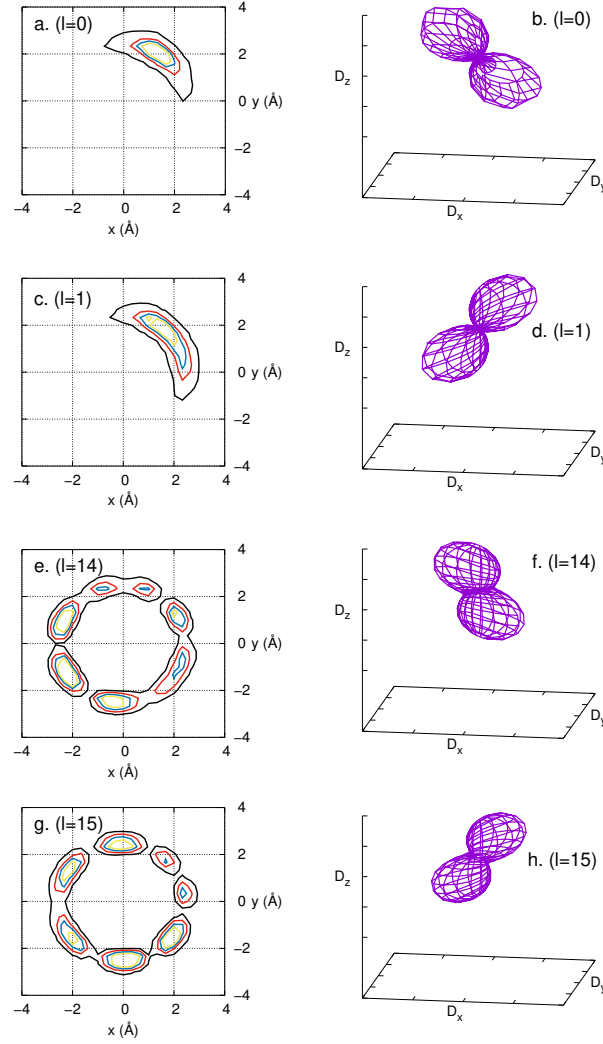

Figure S2: Probability densities of selected states of  $\text{H}_2$  adsorbed on  $[\text{H-Cor-Na}]^+$ , within the RB model,  $J=\text{odd}$  block ( $l = 0, 1, 14, 15$ ). Densities projected onto the  $(x, y)$  plane are presented in the left panels whereas, in the right panels, they have been projected onto the orientation of the molecule ( $\theta, \phi$ ) and are displayed as polar plots (i.e.,  $\mathcal{D}_l(\theta, \phi)$  is the radius of a representation in spherical coordinates). The first two levels ( $l = 0, 1$ ), having similar distributions along  $(x, y)$  (a. and c.), differ in the  $\mathcal{D}_l(\theta, \phi)$  densities (b. and d.), which resemble  $p$ -like orbitals pointing to different directions, hence suggesting two distinct preferred orientations of the  $\text{H}_2$  axis. A similar behavior is found for the couple of  $l = 14, 15$  levels (e.-h. panels).

## 5) Sum over states for H<sub>2</sub>/D<sub>2</sub> adsorbed on [H-Cor-Na]<sup>+</sup>

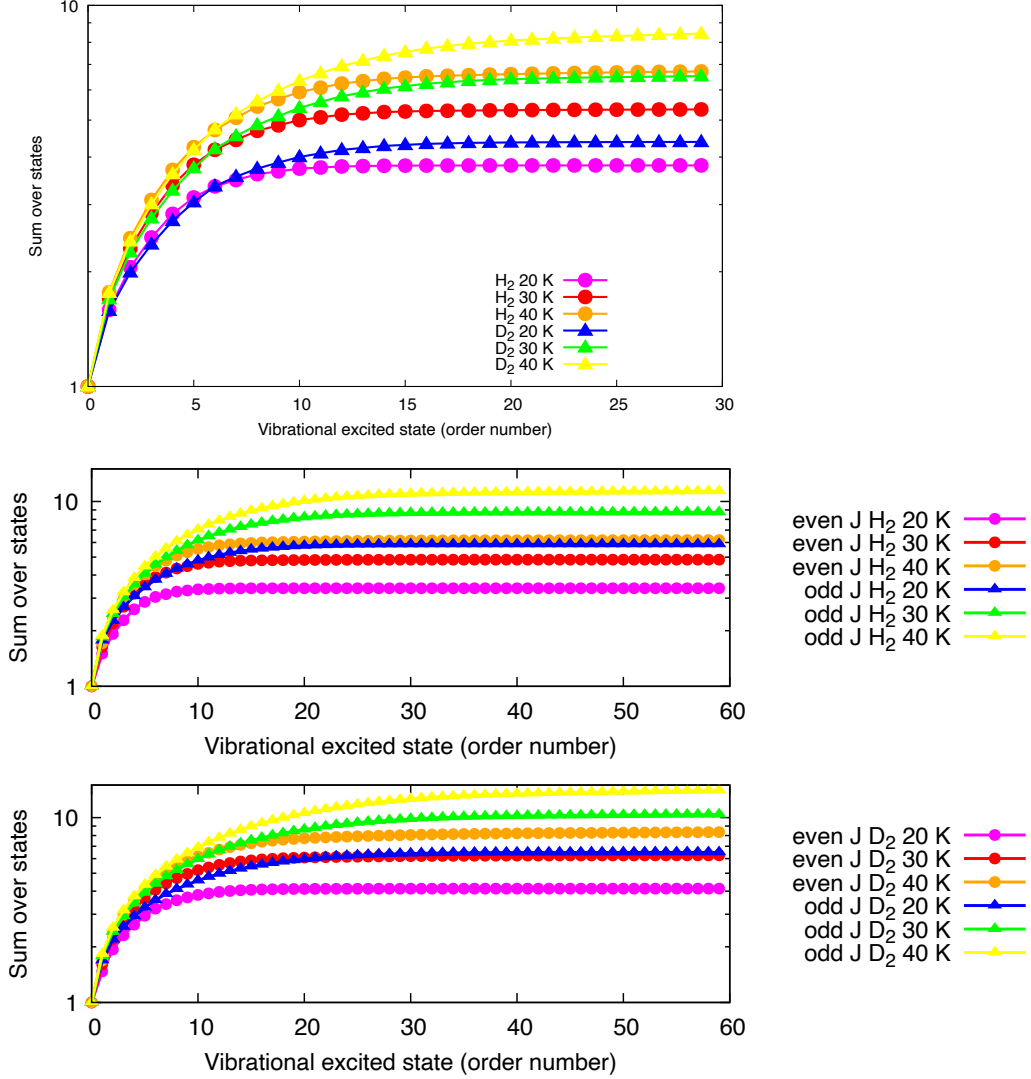

Figure S3: Sum over states,  $\sum_{l=0}^{l_{max}} \exp[-(E_l - E_0)/k_b T]$ , as functions of  $l_{max}$ , computed with the eigenenergies of H<sub>2</sub> and D<sub>2</sub> adsorbed on the Na-decorated plane of [H-Cor-Na]<sup>+</sup>, for three different temperatures,  $T = 20, 30$  and  $40$  K. These sums are part of the last factor of Eq. 5 of the article. Upper panel: H<sub>2</sub> and D<sub>2</sub> within the PsAt approximation. Middle and bottom panel: H<sub>2</sub> and D<sub>2</sub>, respectively, within the RB approach (even- and odd- $J$ ). It can be seen that, depending on the temperature, molecule and approach, a certain number of  $l$  levels are needed to converge the sum: for instance, for PsAt H<sub>2</sub> at  $20$  K, the sum converges with about 10 levels whereas about 30 levels are needed to converge the sum for odd- $J$  RB D<sub>2</sub> at  $40$  K. In any case, it can be seen that the total number of states considered (i.e. 30 and 60 within the PsAt and RB approaches) are sufficient for an accurate determination of the sum of states.

6) Isotherms of  $D_2$  adsorbed on  $[H-Cor-Na]^+$  within the RB model ( $J=\text{even}$ ): comparison with low-temperature approximate calculations

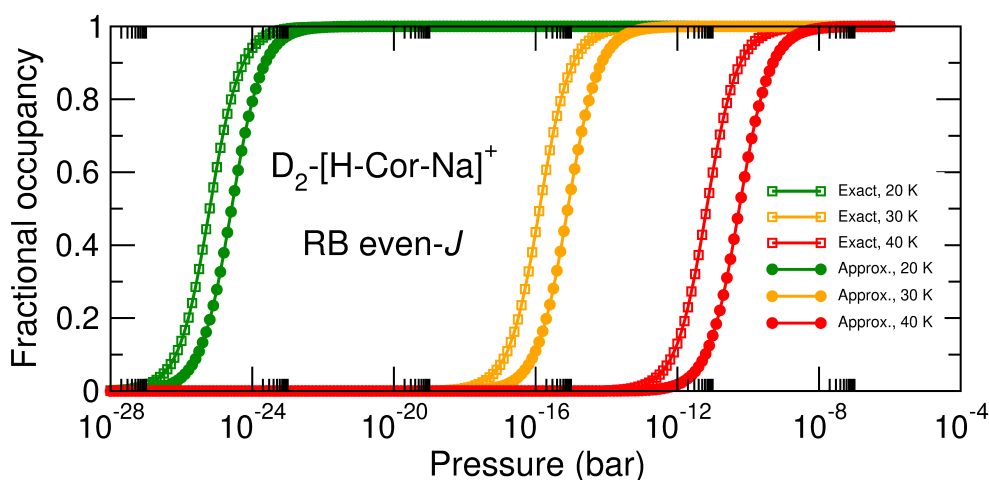

Figure S4: Adsorption isotherms of  $D_2$  on  $[H-Cor-Na]^+$  assuming non-interacting independent adsorption sites at 20, 30, and 40 K, within the even- $J$  RB model: comparison between including all bound states needed (exact, open squares) and neglecting the contributions of the excited states (approximated, filled circles) in the partition functions of the adsorbed molecules. The approximated isotherms overestimate the pressures where the fractional occupancy rises, the effect being relatively small at low temperatures and becoming more important as temperature increases, as expected.

## 7) Excited states energies of H<sub>2</sub>/D<sub>2</sub> adsorbed on [CC-Cor-Na]

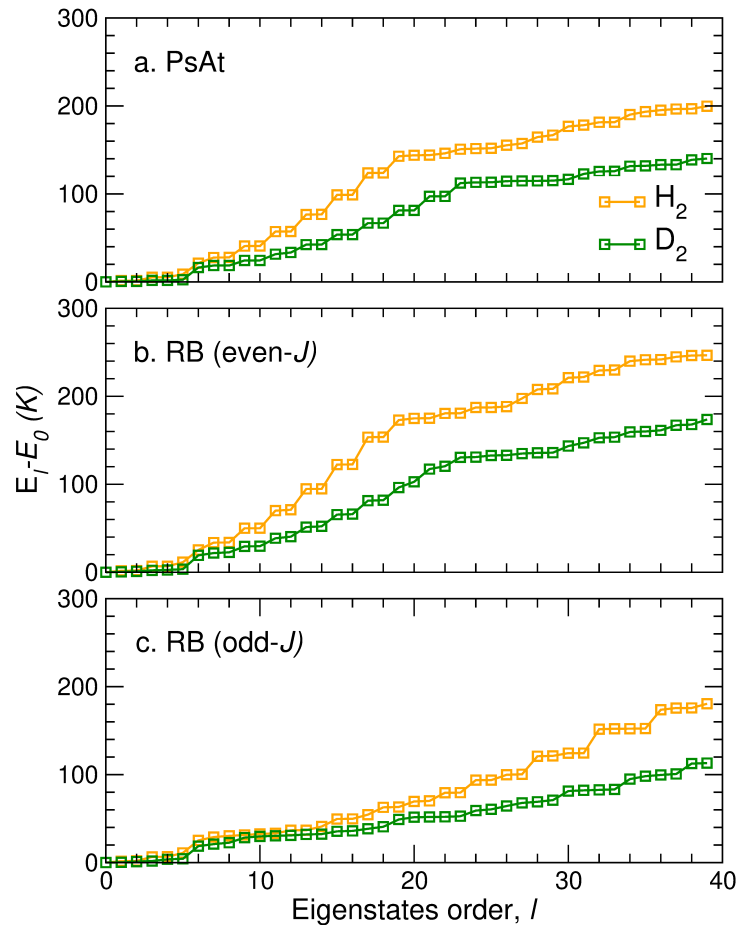

Figure S5: Energy levels of H<sub>2</sub> (yellow) and D<sub>2</sub> (green) adsorbed on [CCCor-Na], as differences with respect to the ground state energy,  $\Delta E_{(l,0)} = E_l - E_0$  (in K), for the PsAt (a.), RB even- $J$  (b.) and RB odd- $J$  (c.) approaches. Notice the presence of degenerate pairs of excited states typical of a “particle on a ring” system and associated to opposite rotation directions.

## 8) Isotherms of H<sub>2</sub> and D<sub>2</sub> adsorbed on [CCCor-Na]

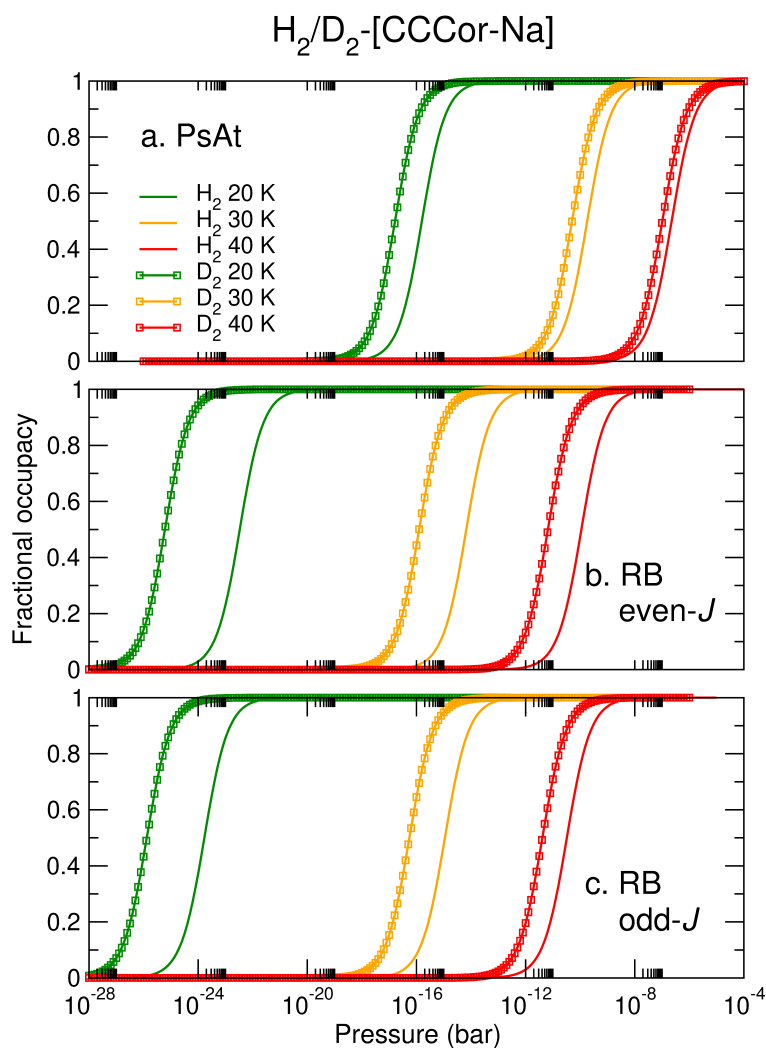

Figure S6: Adsorption isotherms of H<sub>2</sub>/D<sub>2</sub> adsorbed on [CCCor-Na] at 20, 30, and 40 K, assuming non-interacting independent adsorption sites. Top panel: within the PsAt approach. Medium and lower panels: even- $J$  and odd- $J$  states, respectively, within a RB description for the adsorbed molecules. All needed excited states have been included in the calculations of the adsorption partition functions.
